# Supplementary material for: Assessment of short-term symptomatic efficacy of tocilizumab in ankylosing spondylitis: results of randomised, placebo-controlled trials
Source: PubMed Central journal article supplement — Ann Rheum Dis. 2013 Jun 13;73(1):95–100. doi: 10.1136/annrheumdis-2013-203559 (PMC3888605; doi:10.1136/annrheumdis-2013-203559), 2013-06-13
Supplement: annrheumdis-2013-203559-s1.pdf [file annrheumdis-2013-203559-s1.pdf]

**Supplementary Table 1.** Additional exploratory endpoints in BUILDER-1 part 1 at week 12

| <b>Endpoint</b>               | <b>Placebo<br/>n=51</b> | <b>TCZ 8 mg/kg<br/>n=51</b> |
|-------------------------------|-------------------------|-----------------------------|
| ASAS 5/6, n (%)               | 8 (15.7)                | 13 (25.5)                   |
| ASAS partial remission, n (%) | 1 (2.0)                 | 0 (0)                       |
| ASAS–CRP status, mean (SD)    | 3.4 (0.96)              | 2.5 (0.86)                  |

ASAS, Assessments in Ankylosing Spondylitis Response Criteria; CRP, C-reactive protein; SD, standard deviation.

**Supplementary Table 2.** Safety of TCZ in BUILDER-1 and BUILDER-2 (safety population)

|                                                                                        | <b>TCZ 8 mg/kg<br/>n=355</b> | <b>Rate per 100 PY<br/>(95% CI)</b> |
|----------------------------------------------------------------------------------------|------------------------------|-------------------------------------|
| <b>Total PY</b>                                                                        | 169.94                       |                                     |
| <b>Top 5 ranked SOC for all AEs and eye disorders SOC,<br/>n (patients with ≥1 AE)</b> |                              |                                     |
| All AEs                                                                                | 352 (166)                    | 207.1 (186.1-229.9)                 |
| Infection and infestations SOC                                                         | 63 (56)                      | 37.1 (28.5-47.4)                    |
| Gastrointestinal disorders SOC                                                         | 48 (41)                      | 28.2 (20.8-37.5)                    |
| Musculoskeletal and connective tissue disorders SOC                                    | 43 (34)                      | 25.3 (18.3-34.1)                    |
| Investigations SOC                                                                     | 33 (25)                      | 19.4 (13.4-27.3)                    |
| Skin and subcutaneous tissue disorders SOC                                             | 27 (24)                      | 15.9 (10.5-23.1)                    |
| Eye disorders SOC (9th-ranked SOC)                                                     | 14 (12)                      | 8.2 (4.5-13.8)                      |
| <b>Top 5 ranked SOC for SAEs, n (patients with ≥1 SAE)</b>                             |                              |                                     |
| SAEs                                                                                   | 17 (17)                      | 10.0 (5.8-16.0)                     |
| Immune system disorders SOC                                                            | 5 (5)                        | 2.9 (1.0-6.9)                       |
| Musculoskeletal and connective tissue disorders SOC                                    | 4 (4)                        | 2.4 (0.6-6.0)                       |
| Gastrointestinal disorders SOC                                                         | 2 (2)                        | 1.2 (0.1-4.3)                       |
| Infections and infestations SOC                                                        | 2 (2)                        | 1.2 (0.1-4.3)                       |
| Eye disorders SOC                                                                      | 1 (1)                        | 0.6 (0.0-3.3)                       |

AE, adverse event; CI, confidence interval; PY, patient-year; SAE, serious adverse event; SOC, system organ class; TCZ, tocilizumab.
